# Supplementary material for: FHIP and FTS proteins are critical for dynein-mediated transport of early endosomes in Aspergillus
Source: PubMed Central journal article supplement — Mol Biol Cell. 2014 Jul 15;25(14):2181–9. doi: 10.1091/mbc.E14-04-0873 (PMC4091831; doi:10.1091/mbc.e14-04-0873), 2014-07-15

# Supplemental Materials

*Molecular Biology of the Cell*

Yao et al.

### Online Supplemental Materials:

**Figure S1** A sequence alignment of *A. nidulans* FhipA (FhipAAn) with human FHIP (FHIPhHs). The alignment was done using CLUSTALW. Residues that are identical (\*), strongly similar (:) or weakly similar (.) are shown as red, green and blue characters respectively.

**Figure S2** A sequence alignment of *A. nidulans* FtsA (FtsA.An) with human FTS (FTSh.Hs). The alignment was done using CLUSTALW. Residues that are identical (\*), strongly similar (:) or weakly similar (.) are shown as red, green and blue characters respectively.

**Movie S1** Movements of early endosomes in a wild-type strain of *A. nidulans*. Early endosomes labeled by mCherry-RabA undergo bidirectional movements in wild-type hyphae. 30 frames were taken with a 0.1-s exposure time and a 0.3-s interval between frames. Binning: 1x1. The movie speed has been increased 5-fold.

**Movie S2** Early endosomes in the  $\Delta fhipA$  strain. Early endosomes labeled by mCherry-RabA are accumulated at the hyphal tip. 30 frames were taken with a 0.1-s exposure time and a 0.3-s interval between frames. Binning: 1x1. The movie speed has been increased 5-fold.

**Movie S3** Early endosomes in the  $\Delta ftsA$  strain. Early endosomes labeled by mCherry-RabA are accumulated at the hyphal tip. 30 frames were taken with a 0.1-s exposure time and a 0.3-s interval between frames. Binning: 1x1. The movie speed has been increased 5-fold.

Figure S1

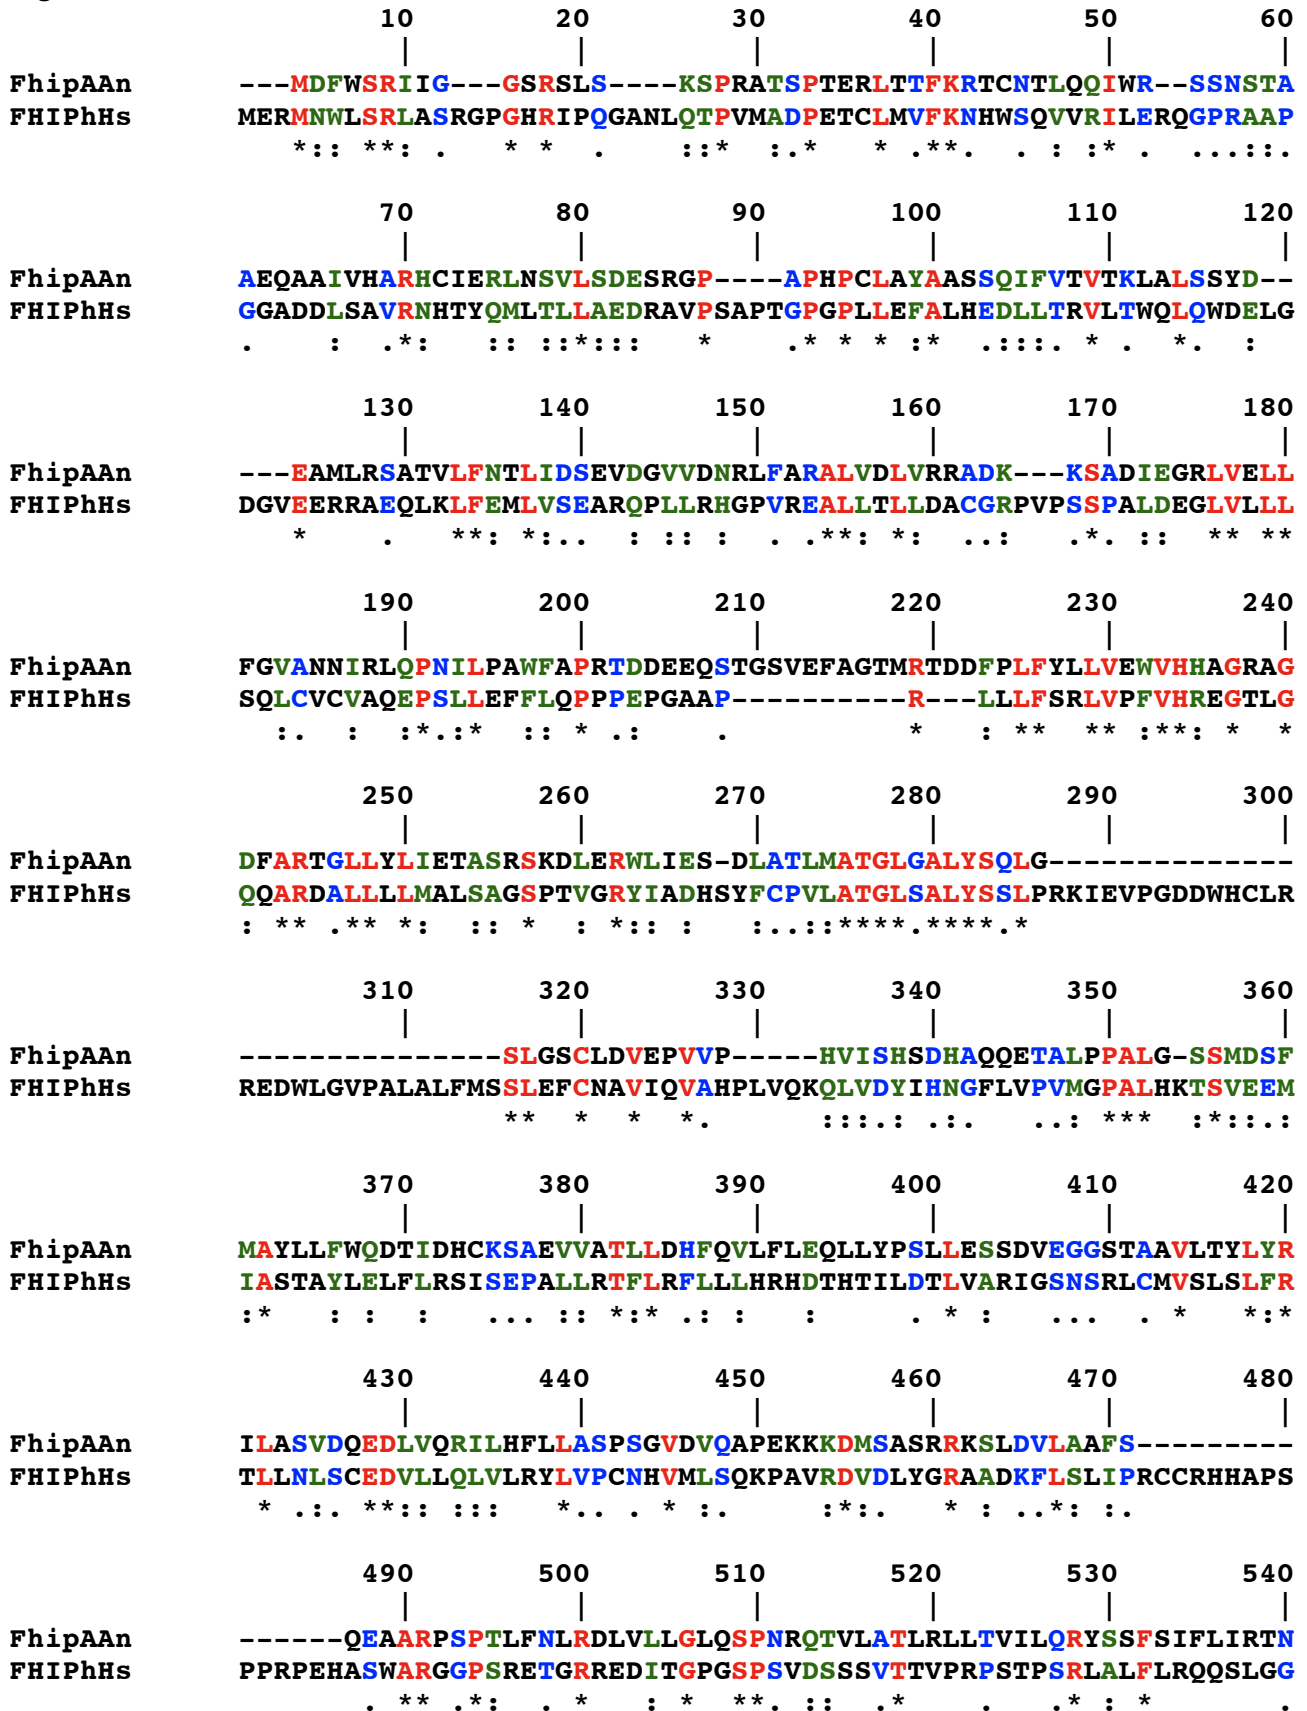



Figure S2

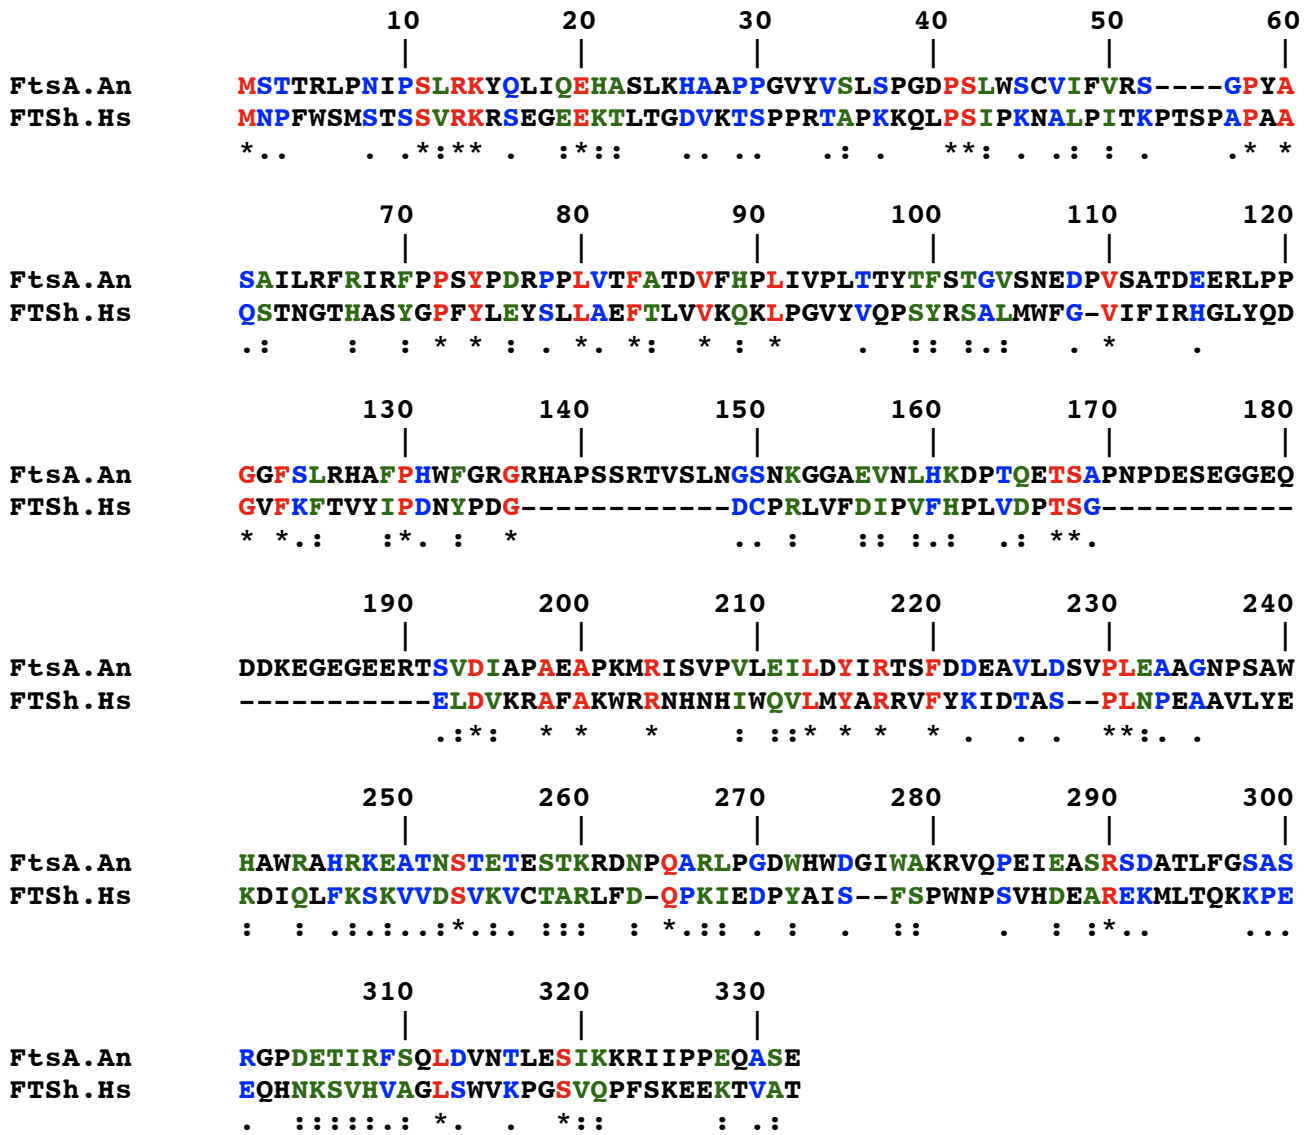

Supplement: supp_E14-04-0873v1_CombinedSupMats.pdf [file supp_E14-04-0873v1_CombinedSupMats.pdf]
